# Supplementary material for: Synthesis of ZSM-5/SAPO-34 zeolite composites from LAPONITE® and their catalytic properties in the MTO reaction
Source: Royal Society of Chemistry journal article supplement (doi:10.1039/d0ce01002b), 2020-01-01
Supplement: d0ce01002b1.pdf [file d0ce01002b1.pdf]

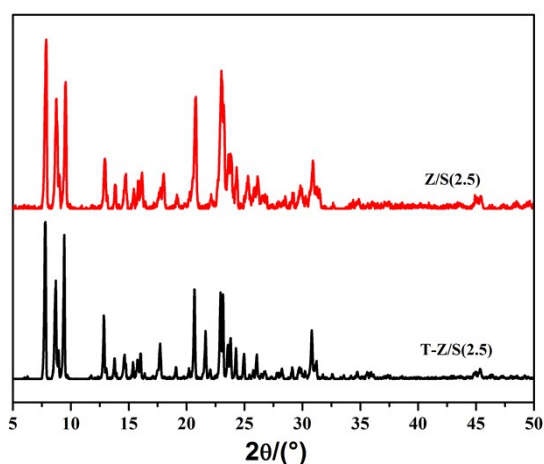

**Figure S1.** XRD patterns of the T-Z/S(2.5) and Z/S(2.5).

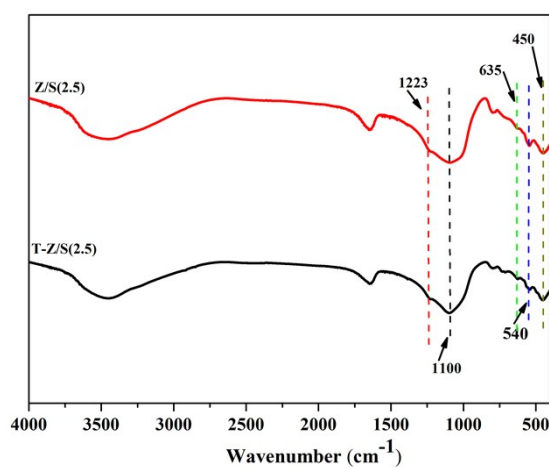

**Figure S2.** FT-IR spectra of T-Z/S(2.5) and Z/S(2.5).

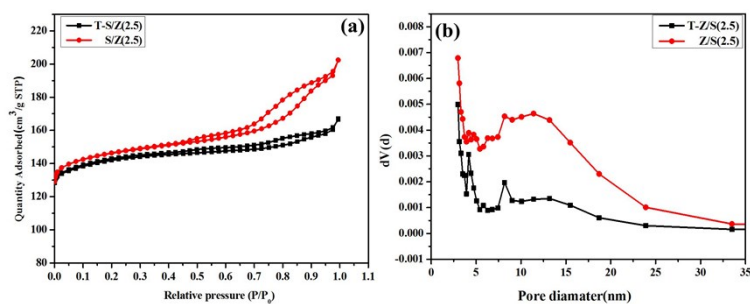

**Figure S3.** N<sub>2</sub> adsorption–desorption isotherms (a) and BJH pore size distribution curves (b) of T-Z/S(2.5) and Z/S(2.5).

**Table S1.** Textural properties of T-Z/S(2.5) and Z/S(2.5).

| Samples     | $S_{\text{BET}}$<br>( $\text{m}^2 \text{g}^{-1}$ ) | $S_{\text{exter}}$<br>( $\text{m}^2 \text{g}^{-1}$ ) | $V_{\text{total}}^{\text{a}}$<br>( $\text{cm}^3 \text{g}^{-1}$ ) | $V_{\text{micro}}^{\text{b}}$<br>( $\text{cm}^3 \text{g}^{-1}$ ) | $V_{\text{meso}}$<br>( $\text{cm}^3 \text{g}^{-1}$ ) |
|-------------|----------------------------------------------------|------------------------------------------------------|------------------------------------------------------------------|------------------------------------------------------------------|------------------------------------------------------|
| T-Z/S (2.5) | 571                                                | 19.8                                                 | 0.259                                                            | 0.214                                                            | 0.045                                                |
| Z/S (2.5)   | 583                                                | 49.5                                                 | 0.314                                                            | 0.206                                                            | 0.108                                                |

<sup>a</sup>Volume adsorbed at  $p/p_0 = 0.99$ .

<sup>b</sup>Determined by the t-Plot method.

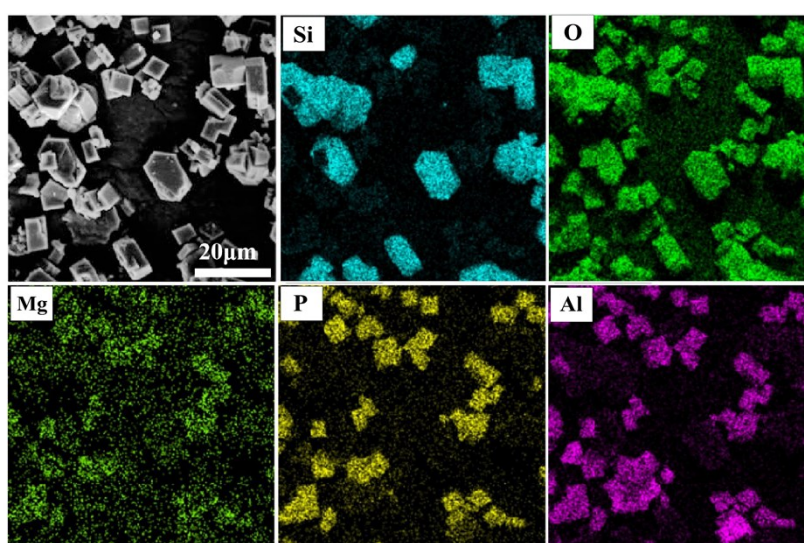

**Figure S4.** SEM image of Z/S(5), and corresponding EDX elemental mapping (Si, O, P, Al, and Mg).

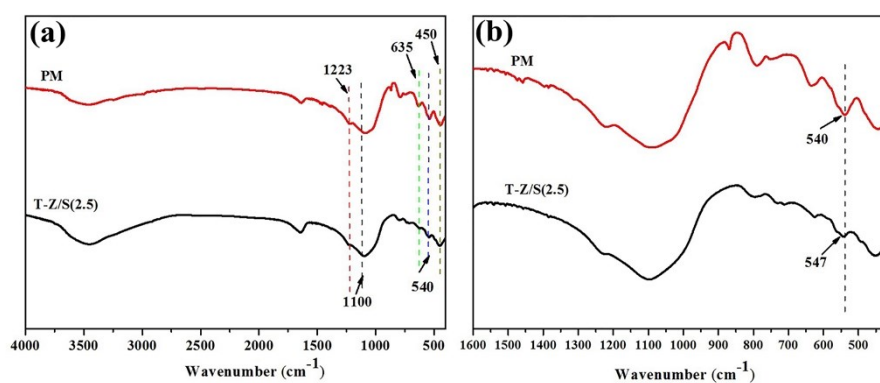

**Figure S5.** (a) FT-IR spectra of PM and T-Z/S(2.5). (b) zoom view between 400 and 1600  $\text{cm}^{-1}$ .

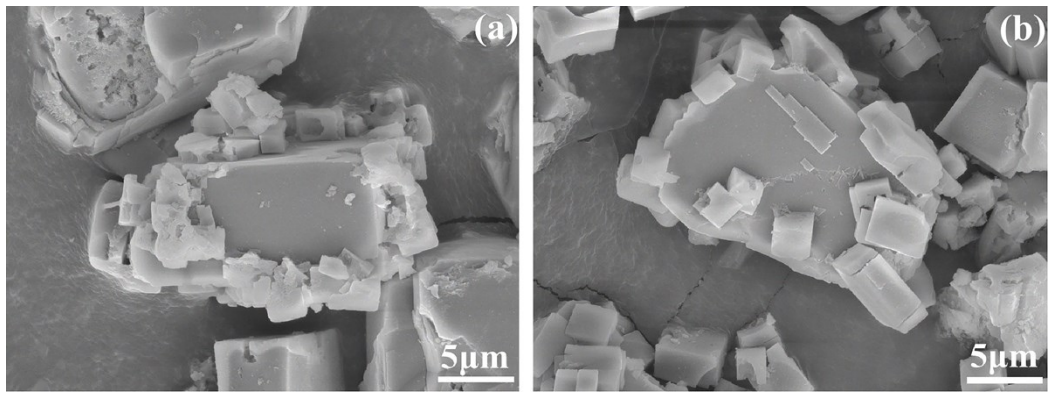

**Figure S6.** SEM images of Z/S(2.5).
